# Supplementary material for: Ba5Y12Zn[O(SiO4)]8: a novel non-centrosymmetric silicate with a short ultraviolet cut-off edge featuring [ZnSi4O16] and [SiO4] units
Source: Royal Society of Chemistry journal article supplement (doi:10.1039/d3nj04480g), 2024-01-01
Supplement: d3nj04480g1.pdf [file d3nj04480g1.pdf]

## Electronic Supplementary Information

### **Ba<sub>5</sub>Y<sub>12</sub>Zn[O(SiO<sub>4</sub>)]<sub>8</sub>: A Novel Non-Centrosymmetric Silicate with a Short Ultraviolet Cut-off Edge Featuring [ZnSi<sub>4</sub>O<sub>16</sub>] and [SiO<sub>4</sub>] Units**

Aihaimaitijiang Ababaikeri;<sup>a</sup> Xueting Pan;<sup>b</sup> Gulimeikereyi Tuniyazi;<sup>a</sup> Xiangzhan Jiang;<sup>c</sup> Yanhui Zhang;<sup>a,\*</sup> Dilnur Malik<sup>a,\*</sup>

*<sup>a</sup>Department of Chemistry & Chemical Engineering, Xinjiang Normal University, Urumqi, Xinjiang, People's Republic of China*

*<sup>b</sup>Xinjiang Laboratory of Phase Transitions and Microstructures in Condensed Matters, College of Physical Science and Technology, Yili Normal University, Yili, Xinjiang, People's Republic of China*

*<sup>c</sup>Institute of Rehabilitation Engineering, Binzhou Medical University, Yantai, 264003, People's Republic of China*

*\*To whom correspondence should be addressed, E-mails: [pkudilnur@sina.com](mailto:pkudilnur@sina.com) and [zyh0403@xjnu.edu.cn](mailto:zyh0403@xjnu.edu.cn)*

**Table S1.** The final atomic coordinates ( $\times 10^4$ ), equivalent isotropic displacement parameters ( $\text{\AA}^2 \times 10^3$ ), and bond valence sums (BVS) for  $\text{Ba}_5\text{Y}_{12}\text{Zn}[\text{O}(\text{SiO}_4)]_8$

| Atom  | Wyck | S.O.F | <i>x</i> | <i>y</i> | <i>z</i>  | U(eq) | BVS   |
|-------|------|-------|----------|----------|-----------|-------|-------|
| Ba(1) | 8f   | 1     | 10000    | 8393(1)  | 10000     | 11(1) | 2.099 |
| Ba(2) | 4d   | 0.5   | 5000     | 10000    | 7500      | 29(1) | 2.140 |
| Y(1)  | 8i   | 1     | 7916(1)  | 7916(1)  | 49(2)     | 8(1)  | 2.774 |
| Y(2)  | 16j  | 1     | 6873(1)  | 8994(1)  | 4491(1)   | 7(1)  | 3.077 |
| Zn(1) | 2b   | 1     | 10000    | 10000    | 5000      | 14(1) | 1.954 |
| Si(1) | 8i   | 1     | 8748(1)  | 8748(1)  | 4412(5)   | 9(1)  | 3.859 |
| Si(2) | 8f   | 1     | 6582(1)  | 10000    | 0         | 9(1)  | 3.968 |
| O(1)  | 8i   | 1     | 9336(3)  | 9336(3)  | 3341(15)  | 12(2) | 1.895 |
| O(2)  | 16j  | 1     | 8141(3)  | 7044(3)  | -2722(10) | 9(1)  | 2.064 |
| O(3)  | 8i   | 1     | 8703(3)  | 8703(3)  | 7422(14)  | 13(2) | 1.705 |
| O(4)  | 16j  | 1     | 7070(3)  | 10172(3) | 2434(9)   | 9(1)  | 1.973 |
| O(5)  | 16j  | 1     | 6119(3)  | 9305(3)  | 865(10)   | 13(1) | 2.236 |
| O(6)  | 16j  | 1     | 7992(3)  | 8936(3)  | 3024(10)  | 11(1) | 2.135 |

$U_{\text{eq}}$  is defined as one third of the trace of the orthogonalized  $U_{ij}$  tensor.

**Table S2.** Selected bond lengths (Å) and angles (deg.) for Ba<sub>5</sub>Y<sub>12</sub>Zn[O(SiO<sub>4</sub>)]<sub>8</sub>

| Bond               | Length   | Bond                  | Length   |
|--------------------|----------|-----------------------|----------|
| Ba(1)-O(6)#1       | 2.674(5) | Y(2)-O(2)#1           | 2.210(5) |
| Ba(1)-O(6)#2       | 2.674(5) | Y(2)-O(6)             | 2.238(5) |
| Ba(1)-O(1)#3       | 2.804(5) | Y(2)-O(2)#17          | 2.276(5) |
| Ba(1)-O(1)#2       | 2.804(5) | Y(2)-O(4)#21          | 2.300(5) |
| Ba(1)-O(4)#2       | 2.817(5) | Y(2)-O(5)#16          | 2.332(5) |
| Ba(1)-O(4)#1       | 2.817(5) | Y(2)-O(5)             | 2.472(6) |
| Ba(1)-O(3)         | 2.852(5) | Y(2)-O(4)             | 2.490(5) |
| Ba(1)-O(3)#4       | 2.852(5) | Zn(1)-O(1)#22         | 1.970(7) |
| Ba(2)-O(5)#5       | 2.614(5) | Zn(1)-O(1)#2          | 1.970(7) |
| Ba(2)-O(5)#6       | 2.614(5) | Zn(1)-O(1)#23         | 1.970(7) |
| Ba(2)-O(5)#7       | 2.614(5) | Zn(1)-O(1)            | 1.970(7) |
| Ba(2)-O(5)#8       | 2.614(5) | Si(1)-O(3)            | 1.619(8) |
| Ba(2)-O(5)#11      | 3.053(5) | Si(1)-O(6)            | 1.637(6) |
| Ba(2)-O(5)#12      | 3.053(5) | Si(1)-O(6)#15         | 1.637(6) |
| Ba(2)-O(5)#13      | 3.053(5) | Si(1)-O(1)            | 1.656(8) |
| Ba(2)-O(5)#14      | 3.053(5) | Si(2)-O(4)            | 1.624(5) |
| Y(1)-O(2)          | 2.246(5) | Si(2)-O(4)#24         | 1.624(5) |
| Y(1)-O(2)#15       | 2.246(5) | Si(2)-O(5)#24         | 1.630(6) |
| Y(1)-O(2)#16       | 2.311(5) | Si(2)-O(5)            | 1.630(6) |
| Y(1)-O(2)#17       | 2.311(5) | O(3)-Si(1)-O(6)       | 114.8(3) |
| Y(1)-O(6)          | 2.492(6) | O(3)-Si(1)-O(6)#15    | 114.8(3) |
| Y(1)-O(6)#15       | 2.492(6) | O(6)-Si(1)-O(6)#15    | 99.5(4)  |
| Y(1)-O(3)#18       | 2.514(8) | O(3)-Si(1)-O(1)       | 114.5(4) |
| O(6)-Si(1)-O(1)    | 105.9(3) | O(4)#24-Si(2)-O(5)#24 | 103.1(3) |
| O(6)#15-Si(1)-O(1) | 105.9(3) | O(4)-Si(2)-O(5)       | 103.1(3) |
| O(4)-Si(2)-O(4)#24 | 111.7(4) | O(4)#24-Si(2)-O(5)    | 111.7(3) |
| O(4)-Si(2)-O(5)#24 | 111.7(3) | O(5)#24-Si(2)-O(5)    | 115.8(4) |

**Symmetry codes:** #1 y,x,z+1; #2 -y+2,x,-z+1; #3 x,y,z+1; #4 -y+2,x,-z+2; #5 x,-y+1,-z+1; #6 -x+1,y-1,-z+1; #7 -y+3/2,-x+1/2,z+1/2; #8 y-1/2,x-1/2,z+1/2; #11 y-1/2,-x+1/2,-z+1/2; #12 x,y-1,z+1; #13 -y+3/2,x-1/2,-z+1/2; #14 -x+1,-y+1,z+1; #15 y,x,z; #16 -y+3/2,x+3/2,z+1/2; #17 -x+3/2,-y+3/2,z+1/2; #18 x,y,z-1; #21 x,-y+2,-z+1; #22 -x+2,-y+2,z; #23 y,-x+2,-z+1; #24 x,-y+2,-z

**Table S3.** Anisotropic displacement parameters for Ba<sub>5</sub>Y<sub>12</sub>Zn[O(SiO<sub>4</sub>)]<sub>8</sub>

| Atom  | U <sub>11</sub> | U <sub>22</sub> | U <sub>33</sub> | U <sub>23</sub> | U <sub>13</sub> | U <sub>12</sub> |
|-------|-----------------|-----------------|-----------------|-----------------|-----------------|-----------------|
| Ba(1) | 9(1)            | 11(1)           | 13(1)           | 0               | 2(1)            | 0               |
| Ba(2) | 13(1)           | 13(1)           | 61(2)           | 0               | 0               | 0               |
| Y(1)  | 8(1)            | 8(1)            | 8(1)            | -1(1)           | -1(1)           | 1(1)            |
| Y(2)  | 8(1)            | 7(1)            | 7(1)            | 0(1)            | 0(1)            | 0(1)            |
| Zn(1) | 9(1)            | 9(1)            | 23(1)           | 0               | 0               | 0               |
| Si(1) | 9(1)            | 9(1)            | 7(1)            | 0(1)            | 0(1)            | 0(1)            |
| Si(2) | 12(1)           | 8(1)            | 6(1)            | 2(1)            | 0               | 0               |
| O(1)  | 10(2)           | 10(2)           | 14(4)           | 0(2)            | 0(2)            | -4(3)           |
| O(2)  | 10(3)           | 4(3)            | 12(3)           | 4(2)            | -1(2)           | 3(2)            |
| O(3)  | 16(3)           | 16(3)           | 8(4)            | -1(2)           | -1(2)           | 4(3)            |
| O(4)  | 12(3)           | 8(3)            | 6(2)            | -2(2)           | -1(2)           | 1(2)            |
| O(5)  | 18(3)           | 10(3)           | 12(3)           | -1(2)           | 0(2)            | -1(2)           |
| O(6)  | 8(3)            | 12(3)           | 12(2)           | 0(2)            | 1(2)            | -1(2)           |

**Table S4.** Examples of Ba, Zn, and Y-containing silicates searched from ICSD

| No | Compound                                                               | Crystal system | Space group  | Cation oxides                                          | Si-O anionic unit                                                    | $n_M/n_{Si}$ ratio | Dimension of anionic groups | Ref.             |
|----|------------------------------------------------------------------------|----------------|--------------|--------------------------------------------------------|----------------------------------------------------------------------|--------------------|-----------------------------|------------------|
| 1  | $\alpha$ -SiO <sub>2</sub>                                             | Trigonal       | $P3_221$     |                                                        | SiO <sub>4</sub>                                                     |                    | 3D                          | [1]              |
| 2  | ZnSiO <sub>3</sub> -1                                                  | Monoclinic     | $C2/c$       | ZnO <sub>4</sub> , ZnO <sub>6</sub>                    | Si <sub>2</sub> O <sub>7</sub>                                       | 1:1                | 1D                          | [2]              |
| 3  | ZnSiO <sub>3</sub> -2                                                  | Orthorhombic   | $Pbca$       | ZnO <sub>4</sub>                                       | Si <sub>2</sub> O <sub>7</sub>                                       | 1:1                | 1D                          | [2]              |
| 4  | ZnSiO <sub>3</sub> -3                                                  | Monoclinic     | $P2_1/c$     | ZnO <sub>4</sub>                                       | Si <sub>2</sub> O <sub>7</sub>                                       | 1:1                | 1D                          | [3]              |
| 5  | ZnSiO <sub>3</sub> (HP)                                                | Monoclinic     | $C2/c$       | ZnO <sub>6</sub>                                       | Si <sub>2</sub> O <sub>7</sub>                                       | 1:1                | 1D                          | [3]              |
| 6  | Zn <sub>2</sub> SiO <sub>4</sub> -1                                    | Trigonal       | $R\bar{3}H$  | ZnO <sub>4</sub>                                       | SiO <sub>4</sub>                                                     | 2:1                | 0D                          | [4]              |
| 7  | Zn <sub>2</sub> SiO <sub>4</sub> -2                                    | Tetragonal     | $I\bar{4}2d$ | ZnO <sub>4</sub>                                       | SiO <sub>4</sub>                                                     | 2:1                | 0D                          | [5]              |
| 8  | Zn <sub>2</sub> SiO <sub>4</sub> -3                                    | Trigonal       | $R\bar{3}R$  | ZnO <sub>4</sub>                                       | SiO <sub>4</sub>                                                     | 2:1                | 0D                          | [6]              |
| 9  | Zn <sub>2</sub> SiO <sub>4</sub> -4                                    | Orthorhombic   | $Pnma$       | ZnO <sub>4</sub>                                       | SiO <sub>4</sub>                                                     | 2:1                | 0D                          | [7]              |
| 10 | Zn <sub>2</sub> SiO <sub>4</sub> -5                                    | Orthorhombic   | $Pbca$       | ZnO <sub>4</sub>                                       | SiO <sub>4</sub>                                                     | 2:1                | 0D                          | [7]              |
| 11 | Y <sub>2</sub> (SiO <sub>4</sub> )O-1                                  | Monoclinic     | $C2/c$       | YO <sub>6</sub> , YO <sub>7</sub>                      | SiO <sub>4</sub>                                                     | 2:1                | 0D                          | [8]              |
| 12 | Y <sub>2</sub> (SiO <sub>4</sub> )O-2                                  | Monoclinic     | $I2/a$       | YO <sub>6</sub> , YO <sub>7</sub>                      | SiO <sub>4</sub>                                                     | 2:1                | 0D                          | [9]              |
| 13 | Y <sub>2</sub> (SiO <sub>4</sub> )O-3                                  | Monoclinic     | $P2_1/c$     | YO <sub>7</sub> , YO <sub>8</sub>                      | SiO <sub>4</sub>                                                     | 2:1                | 0D                          | [10]             |
| 14 | Y <sub>2</sub> Si <sub>2</sub> O <sub>7</sub> -1                       | Monoclinic     | $P2_1/m$     | YO <sub>6</sub>                                        | Si <sub>2</sub> O <sub>7</sub>                                       | 1:1                | 0D                          | [11]             |
| 15 | Y <sub>2</sub> Si <sub>2</sub> O <sub>7</sub> -2                       | Monoclinic     | $P2_1/a$     | YO <sub>6</sub>                                        | Si <sub>2</sub> O <sub>7</sub>                                       | 1:1                | 0D                          | S11]             |
| 16 | Y <sub>2</sub> Si <sub>2</sub> O <sub>7</sub> -3                       | Orthorhombic   | $Pnam$       | YO <sub>7</sub>                                        | Si <sub>2</sub> O <sub>7</sub>                                       | 1:1                | 0D                          | [12]             |
| 17 | Y <sub>2</sub> Si <sub>2</sub> O <sub>7</sub> -4                       | Orthorhombic   | $Pna2_1$     | YO <sub>7</sub>                                        | Si <sub>2</sub> O <sub>7</sub>                                       | 1:1                | 0D                          | [13]             |
| 18 | Y <sub>2</sub> Si <sub>2</sub> O <sub>7</sub> -5                       | Monoclinic     | $P2_1/c$     | YO <sub>6</sub>                                        | Si <sub>2</sub> O <sub>7</sub>                                       | 1:1                | 0D                          | [14]             |
| 19 | Y <sub>2</sub> Si <sub>2</sub> O <sub>7</sub> -6                       | Triclinic      | $P\bar{1}$   | YO <sub>6</sub> , YO <sub>8</sub>                      | Si <sub>2</sub> O <sub>7</sub> , SiO <sub>3</sub> , SiO <sub>4</sub> | 1:1                | 0D                          | [14]             |
| 20 | Y <sub>2</sub> Si <sub>2</sub> O <sub>7</sub> -7                       | Monoclinic     | $C2/m$       | YO <sub>6</sub>                                        | Si <sub>2</sub> O <sub>7</sub>                                       | 1:1                | 0D                          | [15]             |
| 21 | Y <sub>4.67</sub> (SiO <sub>4</sub> ) <sub>3</sub> O                   | Hexagonal      | $P6_3/m$     | YO <sub>7</sub> , YO <sub>9</sub>                      | SiO <sub>4</sub>                                                     | 1.3:1              | 0D                          | [16]             |
| 22 | Ba <sub>2</sub> SiO <sub>4</sub>                                       | Orthorhombic   | $Pmcn$       | BaO <sub>9</sub>                                       | SiO <sub>4</sub>                                                     | 2:1                | 0D                          | [17]             |
| 23 | BaSi <sub>4</sub> O <sub>9</sub>                                       | Hexagonal      | $P\bar{6}c2$ | BaO <sub>12</sub>                                      | Si <sub>7</sub> O <sub>22</sub>                                      | 1:4                | 3D                          | [18]             |
| 24 | Ba <sub>3</sub> OSiO <sub>4</sub>                                      | Tetragonal     | $I4/mcm$     | BaO <sub>10</sub> , BaO <sub>8</sub>                   | SiO <sub>4</sub>                                                     | 3:1                | 0D                          | [19]             |
| 25 | Ba <sub>2</sub> Si <sub>4</sub> O <sub>10</sub> -1                     | Monoclinic     | $C2/c$       | BaO <sub>7</sub> , BaO <sub>8</sub>                    | Si <sub>6</sub> O <sub>18</sub> ring                                 | 1:2                | 2D                          | [20]             |
| 26 | Ba <sub>2</sub> Si <sub>4</sub> O <sub>10</sub> -2                     | Orthorhombic   | $Pmcn$       | BaO <sub>7</sub>                                       | Si <sub>6</sub> O <sub>18</sub>                                      | 1:2                | 2D                          | [21]             |
| 27 | BaSi <sub>2</sub> O <sub>5</sub> -3                                    | Orthorhombic   | $Pcmn$       | BaO <sub>7</sub>                                       | Si <sub>6</sub> O <sub>18</sub>                                      | 1:2                | 2D                          | [22]             |
| 28 | Ba <sub>4</sub> Si <sub>6</sub> O <sub>16</sub> -1                     | Monoclinic     | $P2_1$       | BaO <sub>6</sub> , BaO <sub>8</sub> , BaO <sub>9</sub> | Si <sub>6</sub> O <sub>18</sub>                                      | 1:1.5              | 2D                          | [23]             |
| 29 | Ba <sub>4</sub> Si <sub>6</sub> O <sub>16</sub> -2                     | Monoclinic     | $P2_1/c$     | BaO <sub>6</sub> , BaO <sub>7</sub>                    | Si <sub>6</sub> O <sub>18</sub>                                      | 1:1.5              | 2D                          | [21]             |
| 30 | Ba <sub>5</sub> Si <sub>8</sub> O <sub>21</sub>                        | Monoclinic     | $C2/c$       | BaO <sub>6</sub> , BaO <sub>7</sub>                    | Si <sub>6</sub> O <sub>18</sub>                                      | 1:1.6              | 2D                          | [24]             |
| 31 | Ba <sub>6</sub> Si <sub>10</sub> O <sub>26</sub>                       | Monoclinic     | $P2_1/c$     | BaO <sub>6</sub> , BaO <sub>7</sub>                    | Si <sub>6</sub> O <sub>18</sub>                                      | 1:1.6              | 2D                          | [21]             |
| 32 | BaSiO <sub>3</sub> -1                                                  | Orthorhombic   | $P2_12_12_1$ | BaO <sub>8</sub>                                       | Si <sub>2</sub> O <sub>7</sub>                                       | 1:1                | 0D                          | [17]             |
| 33 | BaSiO <sub>3</sub> -2                                                  | Trigonal       | $R\bar{3}mH$ | BaO <sub>12</sub> , BaO <sub>8</sub>                   | Si <sub>6</sub> O <sub>12</sub> , SiO <sub>6</sub>                   | 1:1                | 2D                          | [25]             |
| 34 | BaSiO <sub>3</sub> -3                                                  | Hexagonal      | $P6_3/mmc$   | BaO <sub>9</sub>                                       | Si <sub>7</sub> O <sub>18</sub>                                      | 1:1                | 2D                          | [25]             |
| 35 | BaZnSiO <sub>4</sub>                                                   | Hexagonal      | $P6_3$       | BaO <sub>6</sub> , BaO <sub>9</sub> , ZnO <sub>4</sub> | SiO <sub>4</sub>                                                     | 2:1                | 0D                          | [26]             |
| 36 | BaZn <sub>2</sub> Si <sub>2</sub> O <sub>7</sub>                       | Orthorhombic   | $Cmc2_1$     | BaO <sub>5</sub> , ZnO <sub>4</sub>                    | Si <sub>2</sub> O <sub>7</sub>                                       | 1.5:1              | 0D                          | [27]             |
| 37 | Ba <sub>2</sub> ZnSi <sub>2</sub> O <sub>7</sub>                       | Monoclinic     | $C2/c$       | BaO <sub>8</sub> , ZnO <sub>4</sub>                    | Si <sub>2</sub> O <sub>7</sub>                                       | 1.5:1              | 0D                          | [28]             |
| 38 | BaZnSi <sub>3</sub> O <sub>8</sub>                                     | Monoclinic     | $P2_1/a$     | BaO <sub>8</sub> , ZnO <sub>2</sub>                    | Si <sub>6</sub> O <sub>18</sub>                                      | 1:1.5              | 2D                          | [29]             |
| 39 | Ba <sub>5</sub> Y <sub>12</sub> Zn[O(SiO <sub>4</sub> ) <sub>8</sub> ] | Tetragonal     | $I\bar{4}2m$ | BaO <sub>8</sub> , YO <sub>7</sub> , ZnO <sub>4</sub>  | SiO <sub>4</sub>                                                     | 2.3:1              | 0D                          | <b>This work</b> |

Note: The determination of the crystal phase is subject to the order of time.

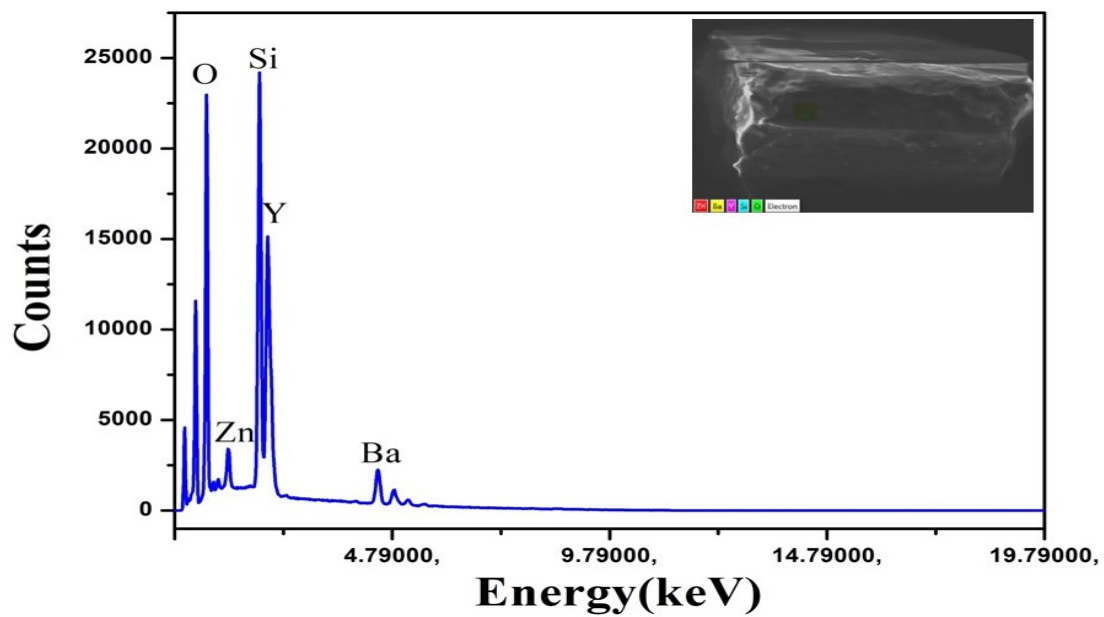

**Figure S1** Energy dispersive X-ray spectroscopic (EDS) spectrum of  $\text{Ba}_5\text{Y}_{12}\text{Zn}[\text{O}(\text{SiO}_4)]_8$

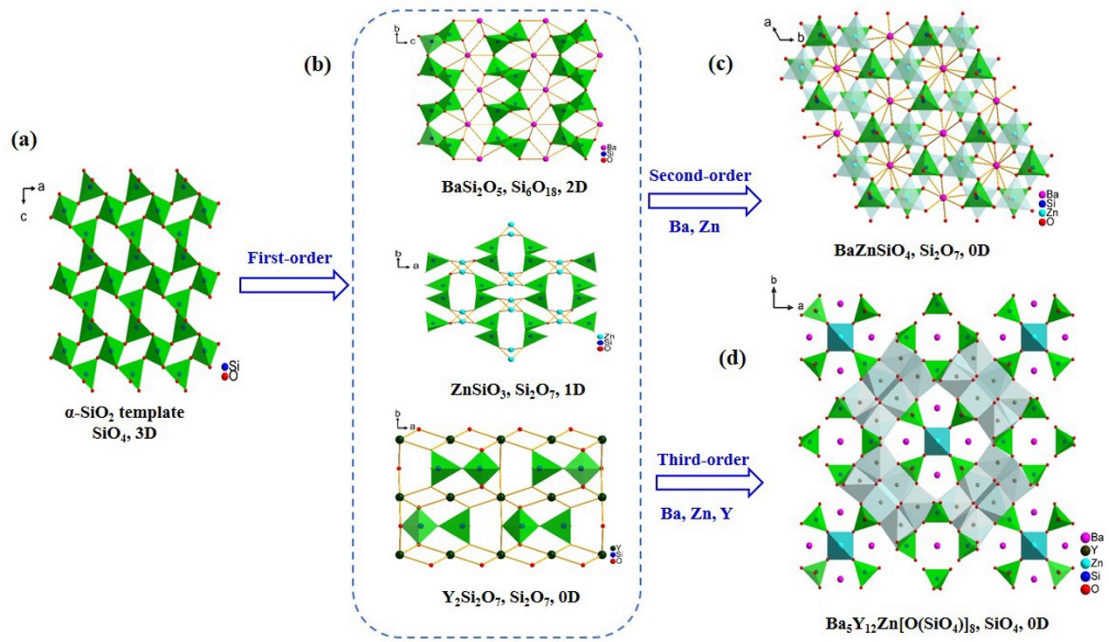

**Figure S2** The structural evolution of anionic groups from (a) 3D network of  $\alpha$ -SiO<sub>2</sub> down the  $b$ -axis to (b) 2D layers, 1D chains, 0D infinite groups of BaSi<sub>2</sub>O<sub>5</sub>, ZnSiO<sub>3</sub>, Y<sub>2</sub>Si<sub>2</sub>O<sub>7</sub> crystals to (c, d) 0D isolated SiO<sub>4</sub> units of BaZnSiO<sub>4</sub> and Ba<sub>5</sub>Y<sub>12</sub>Zn[O(SiO<sub>4</sub>)]<sub>8</sub> crystals down the  $c$ -axis.

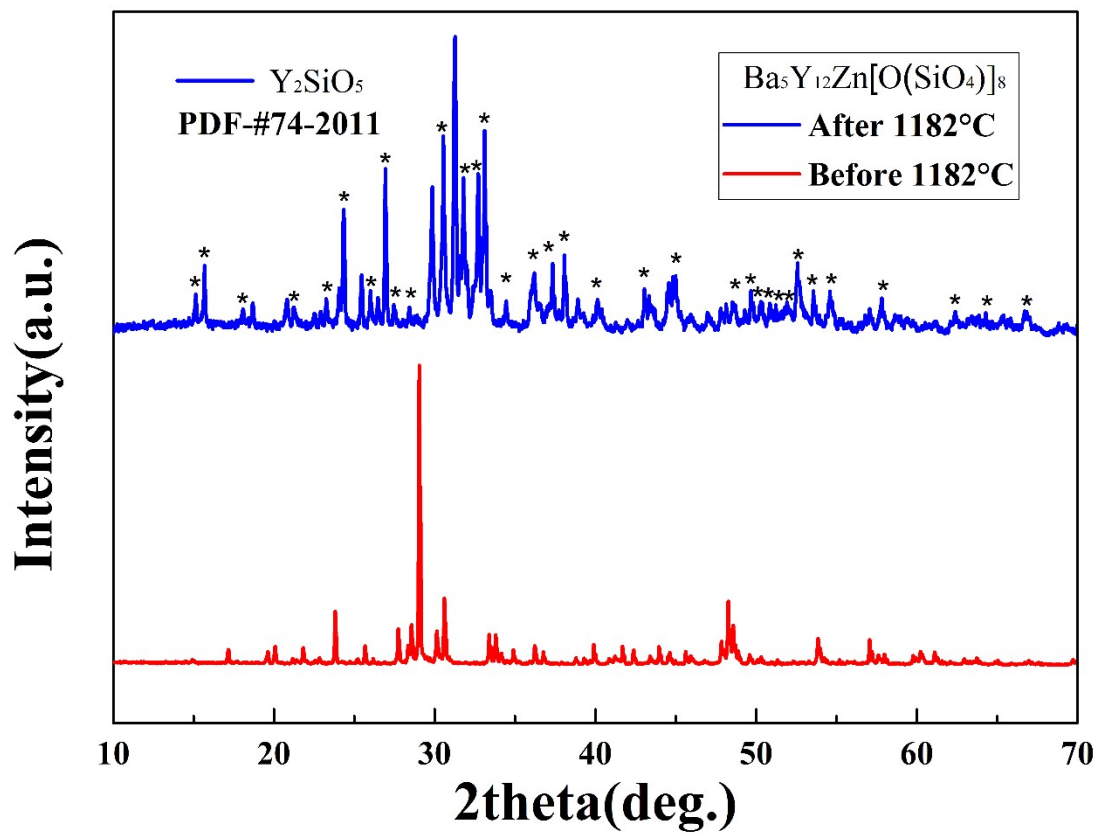

Figure S3 Experimental powder X-ray diffraction pattern of  $Ba_5Y_{12}Zn[O(SiO_4)]_8$



## Notes and references

- 1 Y. Lepage, G. Donnay, *Acta Cryst.*, 1976, **B32**, 2456-2459.
- 2 N. Morimoto, Y. Nakajima, *Acta Cryst.*, 1975, **B31**, 1041-1049.
- 3 T. Arlt, R. J. Angel, *Phys Chem Mineral.*, 2000, **27**, 719-731.
- 4 K. H. Klaska, J. C. Eck, D. Pohl, *Acta Crystallogr.*, 1978, **B34**, 3324-3325.
- 5 F. Marumo, Y. Syono, *Acta Crystallogr.*, 1971, **B27**, 1868-1870.
- 6 C. Hang, M. Simonov, N. Belov, *Kristallogr.*, 1970, **15**, 457-460.
- 7 X. Y. Liu, M. Kanzaki, X. Y. Xue, *Phys Chem Mineral.*, 2013, **40**, 467-478.
- 8 C. Michel, G. Buisson, E. F. Bertaut, *Sci. Phys.*, 1967, **264**, 397-399.
- 9 B. A. Maksimov, V. V. Ilyukhin, Yu. A. Kharitonov, N. V. Belov, *Kristallogr.*, 1970, **15**, 926-933.
- 10 C. Cannasa, A. Musinua, G. Piccalugaa, C. Deiddab, F. Serrab, M. Bazzonib, S. Enzob, *J. Solid State Chem.*, 2005, **178**, 1526-1532.
- 11 N. G. Batalieva, Yu. A. Pyatenko, *Kristallogr.*, 1971, **16**, 905-922.
- 12 H. W. Dias, F. P. Glasser, R. P. Gunwardane, R. A. Howie, *Z. Kristallogr.*, 1990, **191**, 117-123.
- 13 A. N. Christensen, *Z. Kristallogr.*, 1994, **209**, 7-13.
- 14 M. D. Dolan, B. Harlan, J. S. White, M. Hall, S. T. Misture, S. C. Bancheri and B. Bewlay, *Powder Diffr.*, 2008, **23**, 20-25.
- 15 G. J. Redhammer, G. Roth, *Acta Crystallogr.*, 2003, **C59**, 103-106.
- 16 Z. F. Pan, Y. Xu, Q. S. Hu, W. Q. Li, H. Zhou, Y. F. Zheng, *RSC Adv.*, 2014, **00**, 1-8.
- 17 H. P. Grosse, E. Tillmanns, *Cryst. Struct. Commun.*, 1974, **3**, 599-601.
- 18 L. W. Finger, R. M. Hazens, B. A. Fursenko, *J. Phys. Chem. Solids.*, 1995, **56**, 1389.
- 19 E. Tilimanns, H. P. Grosse, *Acta Crystallogr.*, 1978, **B34**, 649-651.
- 20 H. Katscher, G. Bissert, F. Liebau, *Z. Kristallogr.*, 1973, **137**, 146-158.
- 21 K. F. Hesse, F. Liebau, *Z. Kristallogr.*, 1980, **153**, 33-41.
- 22 M. Goreaud, J. Choisnet, B. Raveau, A. Deschanvres, *Revue de Chimie Minerale.*, 1974, **11**, 207-216.
- 23 O. S. Filipenko, E. A. Pobedinskaya, V. I. Ponomarev, N. V. Belov, *Doklady Akademii Nauk.*, 1971, **196**, 1337-1340.
- 24 J. Zhong, S. Hariyani, Y. Zhuo, W. Zhao, X. Liu, J. Wen, J. Brgoch, *Phys. Chem. Chem. Phys.*, 2020, 1-22.
- 25 H. Yusa, N. SATA, Y. Ohishi, *Am. Mineralogist.*, 2007, **92**, 648-654.
- 26 B. Liu, J. Barbier, *J. Solid State Chem.*, 1993, **102**, 115-125.
- 27 J. H. Lin, G. X. Lu, J. Du, M. Z. Su, C. K. Loong, J. W. Richardson Jr, *J. Phys. Chem. Solids.*, 1999, **60**, 975-983.
- 28 J. W. Kaiser, W. Jeitschko, *Z. Kristallogr.*, 2002, **217**, 25-26.
- 29 Z. Y. Zou, X. Q. Song, L. Jiang, C. L. Yuan, W. Z. Lu, Y. M. Hu, W. Lei, *Chem. Eur. J.*, 2021, **27**, 5992-5998.
